# Supplementary material for: Characterization of the genes responsible for rubber degradation in Actinoplanes sp. strain OR16
Source: PubMed Central journal article supplement (PMC7413915; doi:10.1007/s00253-020-10700-1), 2020-07-18
Supplement: 253_2020_10700_MOESM1_ESM.pdf [file 253_2020_10700_MOESM1_ESM.pdf]

**Applied Microbiology and Biotechnology**

**Characterization of the Genes Responsible for Rubber Degradation  
in *Actinoplanes* sp. Strain OR16.**

Namiko Gibu <sup>1</sup>, Tomoka Arata <sup>1</sup>, Saya Kuboki <sup>1</sup>, Dao Viet Linh <sup>1#</sup>, Masao Fukuda <sup>1§</sup>,  
Alexander Steinbüchel <sup>2,3</sup>, Daisuke Kasai <sup>1\*</sup>

<sup>1</sup>*Department of Bioengineering, Nagaoka University of Technology, Nagaoka, Japan,* <sup>2</sup>*Institut für Molekulare Mikrobiologie und Biotechnologie, Westfälische Wilhelms-Universität Münster, Münster, Germany.,* <sup>3</sup>*Environmental Science Department, King Abdulaziz University, Jeddah, Saudi Arabia.*

\*Corresponding author: Daisuke Kasai

Department of Bioengineering  
Nagaoka University of Technology  
Nagaoka, Niigata 940-2188, Japan  
E-mail: dkasai1@vos.nagaokaut.ac.jp

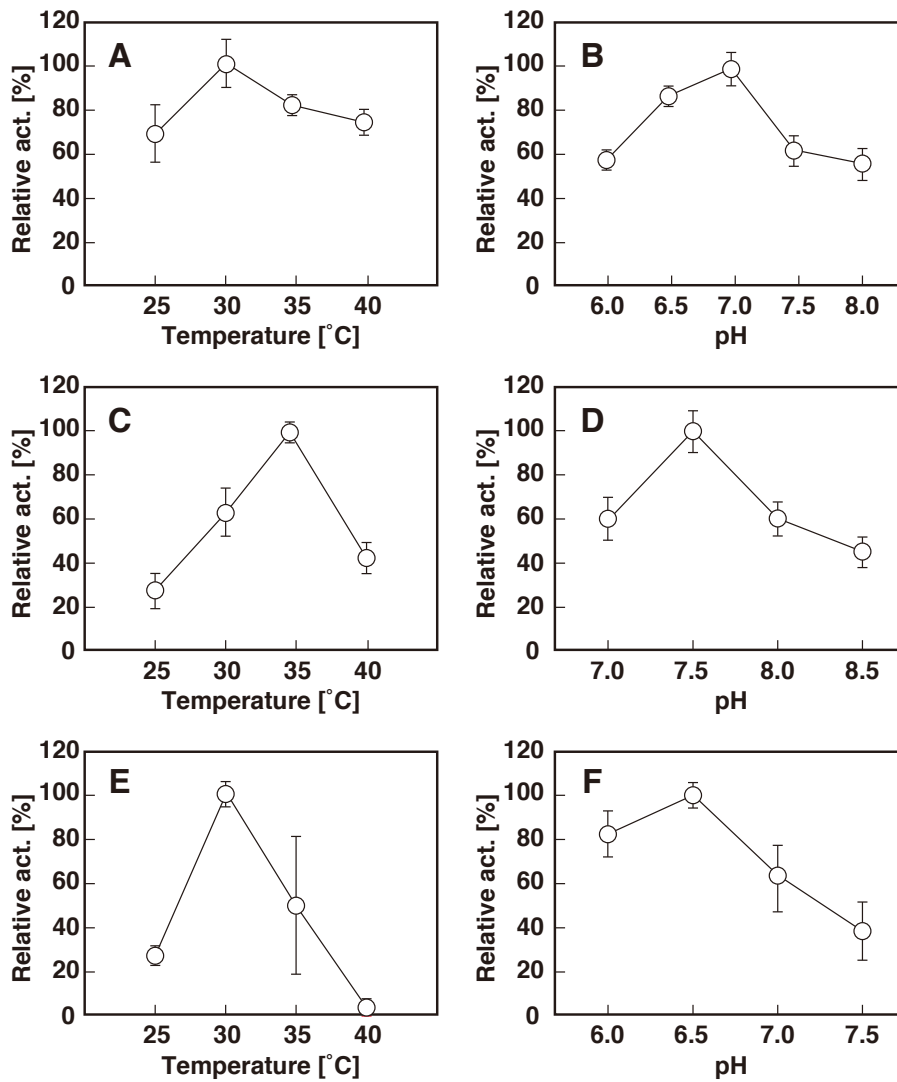

Fig. S1. Effect of temperature (A, C, and E) and pH (B, D, and F) on Lcp activity. Relative oxygen consumption activities of Lcp1-his (A and B), Lcp2-his (C and D), and Lcp3-his (E and F) were indicated. Each value is the average  $\pm$  standard deviation of three independent experiments performed in parallel.
